# Supplementary material for: Tailoring the triplet level of isomorphic Eu/Tb mixed MOFs for sensitive temperature sensing
Source: Royal Society of Chemistry journal article supplement (doi:10.1039/d1cc00297j), 2021-01-01
Supplement: d1cc00297j1.pdf [file d1cc00297j1.pdf]

## Supporting Information

### Tailoring the triplet level of isomorphous Eu/Tb

### mixed MOFs for sensitive temperature sensing

Tifeng Xia,<sup>\*a</sup> Zhengfeng Shao,<sup>a</sup> Xiayan Yan,<sup>a</sup> Meng Liu,<sup>a</sup> Libing Yu,<sup>a</sup> Yating Wan,<sup>c</sup> Dingyue Chang,<sup>a</sup> Jun Zhang,<sup>\*a</sup>  
and Dian Zhao<sup>\*b</sup>

<sup>a</sup>*Institute of Materials, China Academy of Engineering Physics, Mianyang 621907, China. E-mail: [xiatifeng@caep.cn](mailto:xiatifeng@caep.cn), [j-zhang@caep.cn](mailto:j-zhang@caep.cn)*

<sup>b</sup>*Key Laboratory of the Ministry of Education for Advanced Catalysis Materials, Department of Chemistry, Zhejiang Normal University, Jinhua 321004, China. E-mail: [dzhao@zjnu.edu.cn](mailto:dzhao@zjnu.edu.cn)*

<sup>c</sup>*Shanghai Institute of Laser Plasma, China Academy of Engineering Physics, Shanghai 201800, China*

# 1. Experimental

## 1.1 Materials and Measurements

**Materials:** All reagents were obtained from commercial sources and used without further purification. 2-fluorobenzoic acid (2-FBA), 2-hydroxyterephthalic acid (H<sub>2</sub>BDC-OH), 2-aminoterephthalic acid (H<sub>2</sub>BDC-NH<sub>2</sub>), 1,4-naphthalenedicarboxylic acid (1,4-H<sub>2</sub>NDC), europium nitrate hexahydrate (Eu(NO<sub>3</sub>)<sub>3</sub>·6H<sub>2</sub>O), terbium nitrate hexahydrate (Tb(NO<sub>3</sub>)<sub>3</sub>·6H<sub>2</sub>O) and gadolinium nitrate hexahydrate (Gd(NO<sub>3</sub>)<sub>3</sub>·6H<sub>2</sub>O) were obtained from Energy Chemical (Shanghai, China).

**Physical Measurements:** Powder X-ray diffraction (PXRD) data were collected in the  $2\theta = 5^\circ\text{--}50^\circ$  range on a PANalytical X'Pert Pro X-ray diffractometer using Cu-K $\alpha$  ( $\lambda = 1.542 \text{ \AA}$ ) beam at room temperature. The temperature-dependent emission spectra for the powders of Ln-MOFs were recorded on a Hitachi F4600 fluorescence spectrometer using Xe lamp as the light source. The phosphorescence spectra of Gd-based MOFs were measured by an Edinburgh Instrument F920 spectrometer using a  $\mu$ F900 lamp as the light source. UV-Vis absorption spectra of ligands in DMF were performed on UV-2600 spectrometer (Shimadzu Corp, Japan), the testing range was set from 200 to 700 nm. Thermogravimetric analyses (TGA) were conducted on a Netzsch TGA 209 F3 thermogravimeter with a heating rate of  $10 \text{ K}\cdot\text{min}^{-1}$  in N<sub>2</sub> atmosphere. The particle size and morphology was determined by a Hitachi S4800 Scanning Electron Microscope (SEM). Inductively coupled plasma spectroscopy (ICP) was performed on a Thermo IRIS Intrepid II XSP spectrometer.

## 1.2 Synthesis of Ln-MOFs

**Synthesis of LnBDC-OH:** Taking EuBDC-OH as an example, 2-hydroxyterephthalic acid (H<sub>2</sub>BDC-OH, 2.64 mg, 0.0145 mmol), Eu(NO<sub>3</sub>)<sub>3</sub>·6H<sub>2</sub>O (6.47 mg, 0.0145 mmol), 2-fluorobenzoic acid (2-FBA, 16.23 mg, 0.116 mmol), *N,N'*-dimethylformamide (DMF, 730  $\mu$ L), H<sub>2</sub>O (60  $\mu$ L), and HNO<sub>3</sub> (20  $\mu$ L, 3.5 M in DMF) were sealed into a 5 mL Teflon cup. Then, the resulting solution was heated to 110 °C for 3 days and cooled to room temperature. The octahedral crystals of EuBDC-OH were collected and washed with DMF three times. Eu<sub>0.01</sub>Tb<sub>0.99</sub>BDC-OH, Eu<sub>0.05</sub>Tb<sub>0.95</sub>BDC-OH and GdBDC-OH were synthesized similarly to EuBDC-OH except for the use of a mixture of Tb(NO<sub>3</sub>)<sub>3</sub>·6H<sub>2</sub>O and Eu(NO<sub>3</sub>)<sub>3</sub>·6H<sub>2</sub>O or Gd(NO<sub>3</sub>)<sub>3</sub>·6H<sub>2</sub>O, respectively.

**Synthesis of LnBDC-NH<sub>2</sub>:** EuBDC-NH<sub>2</sub> was synthesized by the solvothermal method. A mixture of Eu(NO<sub>3</sub>)<sub>3</sub>·6H<sub>2</sub>O (323.4 mg, 0.725 mmol), 2-aminoterephthalic acid (H<sub>2</sub>BDC-NH<sub>2</sub>, 131.3 mg, 0.725 mmol), 2-fluorobenzoic acid (2-FBA, 812.6 mg, 5.8 mmol), DMF (36.5 mL), H<sub>2</sub>O (3 mL), and HNO<sub>3</sub> (2 mL, 3.5 M in DMF)

was added to a 100 mL Teflon-lined stainless steel reactor, heated at 110 °C for 60 h, and then slowly cooled to room temperature. The colorless crystals of EuBDC-NH<sub>2</sub> were collected and washed with DMF. Eu<sub>0.01</sub>Tb<sub>0.99</sub>BDC-NH<sub>2</sub>, Eu<sub>0.005</sub>Tb<sub>0.995</sub>BDC-NH<sub>2</sub> and GdBDC-NH<sub>2</sub> were synthesized similarly to EuBDC-NH<sub>2</sub> by using a mixture of Tb(NO<sub>3</sub>)<sub>3</sub>·6H<sub>2</sub>O and Eu(NO<sub>3</sub>)<sub>3</sub>·6H<sub>2</sub>O or Gd(NO<sub>3</sub>)<sub>3</sub>·6H<sub>2</sub>O, as the starting lanthanide salts, respectively.

**Synthesis of LnNDC:** EuNDC was solvothermally synthesized using the following method. 1,4-H<sub>2</sub>NDC (9.41 mg, 0.0435 mmol), Eu(NO<sub>3</sub>)<sub>3</sub>·6H<sub>2</sub>O (19.4 mg, 0.0435 mmol), and 2-FBA (48.7 mg, 0.348 mmol) were dissolved in a mixture of DMF (2.2 mL), H<sub>2</sub>O (0.5 mL), and HNO<sub>3</sub> (0.3 mL, 3.5 M in DMF). The solution is sealed in a 20 mL Teflon cup and heated to 115 °C for 60 hours then cooled to room temperature. The colourless polyhedral crystals were collected and washed with DMF and dried at room temperature. Eu<sub>0.01</sub>Tb<sub>0.99</sub>NDC, Eu<sub>0.0005</sub>Tb<sub>0.9995</sub>NDC and GdNDC were synthesized similarly to EuNDC by using a mixture of Tb(NO<sub>3</sub>)<sub>3</sub>·6H<sub>2</sub>O and Eu(NO<sub>3</sub>)<sub>3</sub>·6H<sub>2</sub>O or Gd(NO<sub>3</sub>)<sub>3</sub>·6H<sub>2</sub>O, as the starting lanthanide salts, respectively.

## 2. Tables and Figures

**Table S1** The molar ratio of the starting Eu/Tb salt and that in isomorphous Eu<sup>3+</sup>/Tb<sup>3+</sup> co-doped MOFs calculated by ICP analyses.

| Samples                                                   | Tested Eu by ICP analysis (ppm) | Tested Tb by ICP analysis (ppm) | The Eu/Tb ratios calculated by ICP analysis |
|-----------------------------------------------------------|---------------------------------|---------------------------------|---------------------------------------------|
| Eu <sub>0.01</sub> Tb <sub>0.99</sub> BDC-OH              | 0.68                            | 34.43                           | 0.0194:0.9806                               |
| Eu <sub>0.01</sub> Tb <sub>0.99</sub> BDC-NH <sub>2</sub> | 0.15                            | 8.21                            | 0.0179:0.9821                               |
| Eu <sub>0.01</sub> Tb <sub>0.99</sub> NDC                 | 0.60                            | 34.09                           | 0.0173:0.9827                               |

**Table S2** The singlet and triplet energy level of three ligands.

| Ligands                            | S <sub>1</sub> (cm <sup>-1</sup> ) | T <sub>1</sub> (cm <sup>-1</sup> ) |
|------------------------------------|------------------------------------|------------------------------------|
| H <sub>2</sub> BDC-OH              | 30959                              | 24155                              |
| H <sub>2</sub> BDC-NH <sub>2</sub> | 28409                              | 21277                              |
| 1,4-H <sub>2</sub> NDC             | 32415                              | 20161                              |

Tb (<sup>5</sup>D<sub>4</sub>) 20430 cm<sup>-1</sup>      Eu (<sup>5</sup>D<sub>0</sub>) 17300 cm<sup>-1</sup>

**Table S3** Fitting parameters of isomorphous  $\text{Eu}^{3+}/\text{Tb}^{3+}$  mixed MOFs with empirical sigmoidal Boltzmann Origin8.0 built-in function.

| MOFs                                                | Thermometric parameter                 | $A_1$     | $A_2$     | $x_0$      | $dx$      | $R^2$   |
|-----------------------------------------------------|----------------------------------------|-----------|-----------|------------|-----------|---------|
| $\text{Eu}_{0.01}\text{Tb}_{0.99}\text{BDC-OH}$     | $\Delta(I_{\text{Tb}}/I_{\text{Eu}})$  | 10.5435   | 1.27121   | 128.27589  | 21.61000  | 0.99858 |
| $\text{Eu}_{0.05}\text{Tb}_{0.95}\text{BDC-OH}$     | $\Delta(I_{\text{Tb}}/I_{\text{Eu}})$  | 2.33308   | 0.2564    | 129.86212  | 32.49366  | 0.99993 |
| $\text{Eu}_{0.01}\text{Tb}_{0.99}\text{BDC-NH}_2$   | $\Delta(I_{\text{Tb}}/I_{\text{Eu}})$  | 0.06213   | 1.44115   | 192.25332  | 26.36044  | 0.99876 |
| $\text{Eu}_{0.005}\text{Tb}_{0.995}\text{BDC-NH}_2$ | $\Delta(I_{\text{Tb}}/I_{\text{Eu}})$  | 0.02679   | 113.51387 | 411.06629  | 43.46826  | 0.99481 |
| $\text{Eu}_{0.01}\text{Tb}_{0.99}\text{NDC}$        | $\Delta(I_{\text{Eu}}/I_{\text{NDC}})$ | 28.83290  | 2.35628   | 38.47376   | 7.58088   | 0.99886 |
| $\text{Eu}_{0.0005}\text{Tb}_{0.9995}\text{NDC}$    | $\Delta(I_{\text{Eu}}/I_{\text{NDC}})$ | 305.69263 | 0.47043   | -115.41722 | 233.87621 | 0.99899 |

**Table S4.** Comparing the performance of the Ln-MOF thermometers in terms of temperature range, maximum relative sensitivity ( $S_m$ ) and corresponding temperature ( $T_m$ ).

| MOFs                                                                    | Range (K) | $S_m$ (% $\text{K}^{-1}$ ) | $T_m$ (K) | Ref.      |
|-------------------------------------------------------------------------|-----------|----------------------------|-----------|-----------|
| $\text{Tb}_{0.99}\text{Eu}_{0.01}(\text{bdc})_{1.5}$                    | 290~320   | 0.31                       | 318       | 1         |
| $\text{Tb}_{0.995}\text{Eu}_{0.005}@\text{In}(\text{OH})(\text{bpydc})$ | 283~333   | 4.47                       | 333       | 2         |
| ZJU-88 $\supset$ perylene                                               | 293~353   | 1.28                       | 293       | 3         |
| $\text{Eu}@\text{UiO}-(\text{bpydc})$                                   | 293~353   | 0.31                       | 293       | 4         |
| $\text{Tb}_{0.80}\text{Eu}_{0.20}(\text{bpda})$                         | 303~328   | 2.84                       | 328       | 5         |
| $\text{Nd}_{0.577}\text{Yb}_{0.423}\text{BDC-F}_4$                      | 293~313   | 1.20                       | 313       | 6         |
| $\text{Nd}_{0.866}\text{Yb}_{0.134}\text{BTB}$                          | 303~313   | 4.75                       | 333       | 7         |
| $\text{Nd}_{0.5}\text{Yb}_{0.5}\text{TPTC}$                             | 293~328   | 12.46                      | 293       | 8         |
| $\text{Tb}_{0.99}\text{Eu}_{0.01}(\text{pia})$                          | 100~300   | 2.75                       | 300       | 9         |
| $\text{Eu}_{0.0005}\text{Gd}_{0.9995}\text{NDC}$                        | 293~333   | 3.41                       | 310       | 10        |
| <b><math>\text{Eu}_{0.01}\text{Tb}_{0.99}\text{BDC-OH}</math></b>       | 313~513   | 2.24                       | 425       | This work |
| <b><math>\text{Eu}_{0.05}\text{Tb}_{0.95}\text{BDC-OH}</math></b>       | 313~513   | 1.55                       | 440       | This work |
| <b><math>\text{Eu}_{0.01}\text{Tb}_{0.99}\text{BDC-NH}_2</math></b>     | 313~473   | 2.49                       | 426       | This work |
| <b><math>\text{Eu}_{0.005}\text{Tb}_{0.995}\text{BDC-NH}_2</math></b>   | 313~473   | 2.22                       | 473       | This work |
| <b><math>\text{Eu}_{0.01}\text{Tb}_{0.99}\text{NDC}</math></b>          | 293~333   | 7.32                       | 321       | This work |
| <b><math>\text{Eu}_{0.0005}\text{Tb}_{0.9995}\text{NDC}</math></b>      | 293~333   | 3.16                       | 283       | This work |

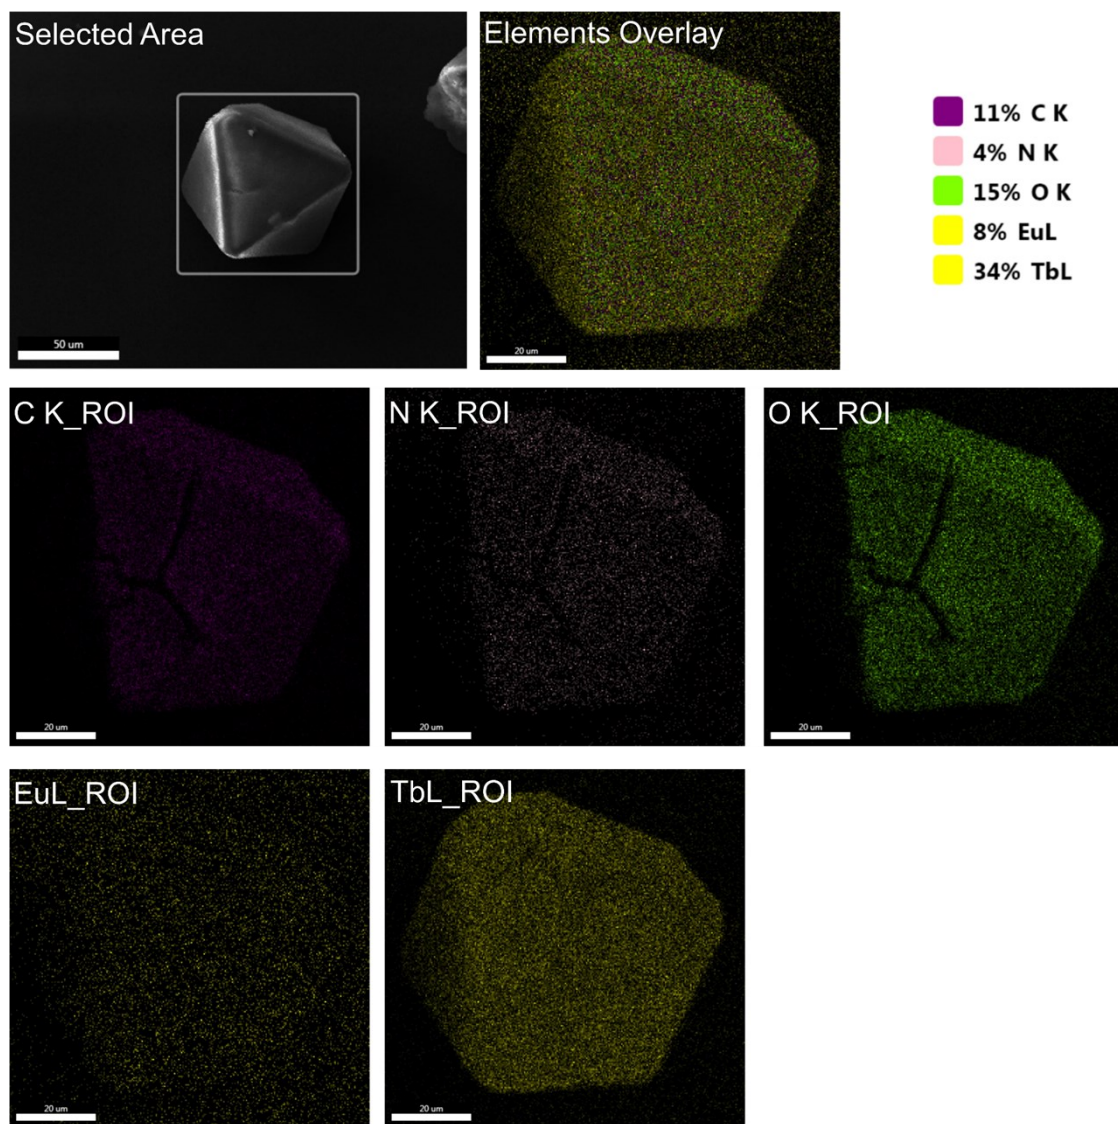

**Fig. S1** EDS mapping of  $\text{Eu}_{0.01}\text{Tb}_{0.99}\text{BDC-NH}_2$ .

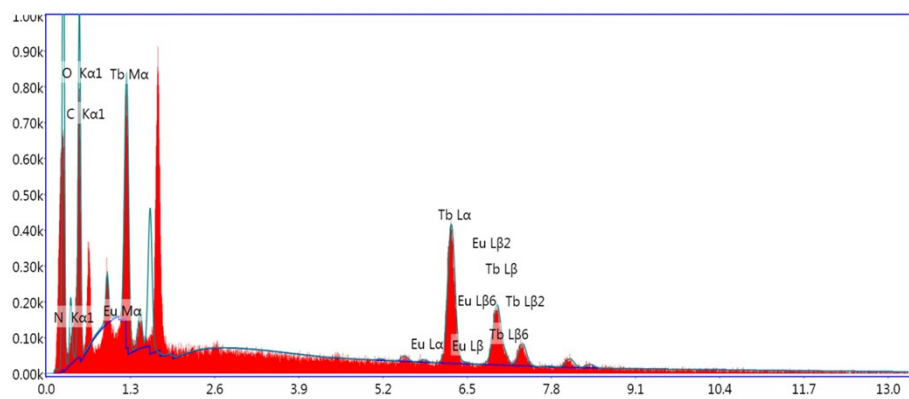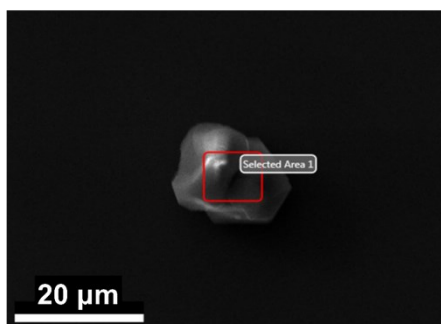

| Elements | Weight ratio (%) | Atomic ratio (%) | Signal intensity |
|----------|------------------|------------------|------------------|
| C K      | 31.40            | 49.80            | 614.51           |
| N K      | 11.29            | 15.36            | 78.63            |
| O K      | 26.12            | 31.10            | 485.09           |
| EuL      | 0.59             | 0.07             | 10.95            |
| TbL      | 30.60            | 3.67             | 541.00           |

**Fig. S2** The elemental composition of  $\text{Eu}_{0.01}\text{Tb}_{0.99}\text{BDC-OH}$  determined by EDS.

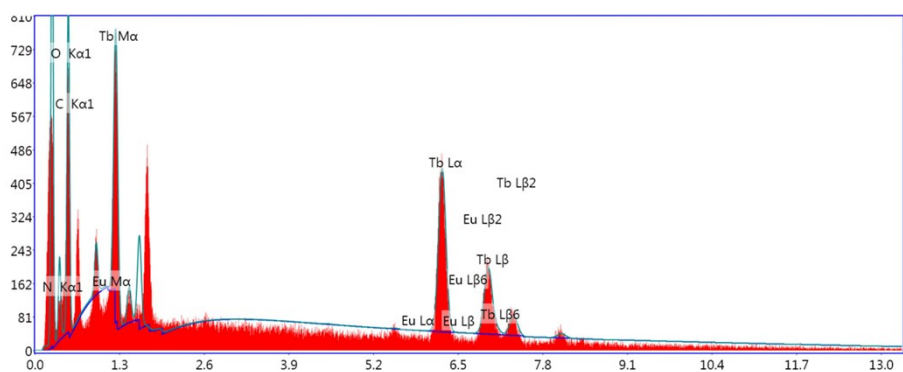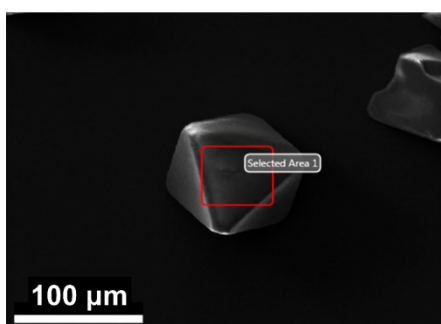

| Elements | Weight ratio (%) | Atomic ratio (%) | Signal intensity |
|----------|------------------|------------------|------------------|
| C K      | 29.24            | 49.37            | 518.97           |
| N K      | 12.17            | 17.62            | 82.59            |
| O K      | 22.40            | 28.38            | 388.60           |
| EuL      | 0.44             | 0.06             | 7.81             |
| TbL      | 35.74            | 4.56             | 597.60           |

**Fig. S3** The elemental composition of  $\text{Eu}_{0.01}\text{Tb}_{0.99}\text{BDC-NH}_2$  determined by EDS.

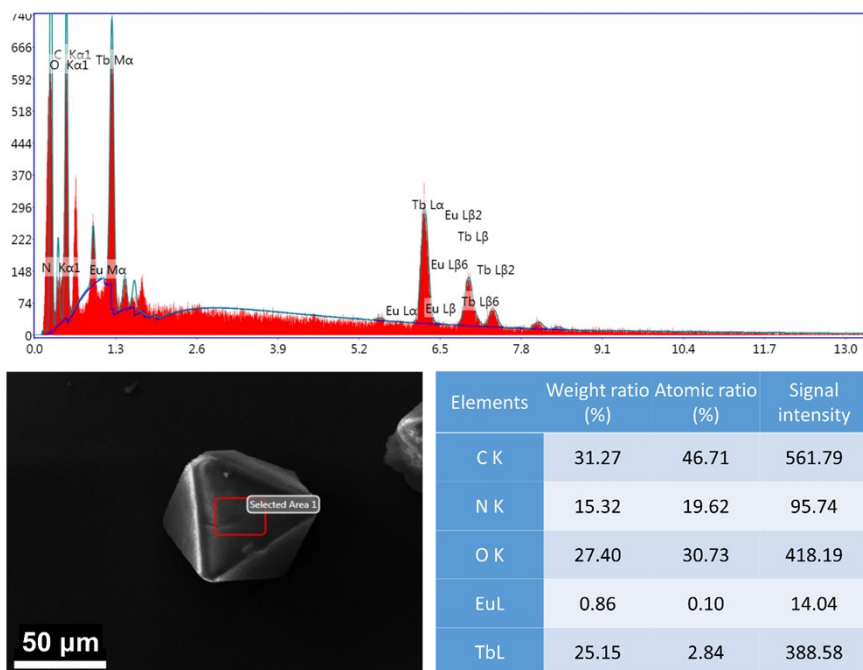

Fig. S4 The elemental composition of  $\text{Eu}_{0.01}\text{Tb}_{0.99}\text{NDC}$  determined by EDS.

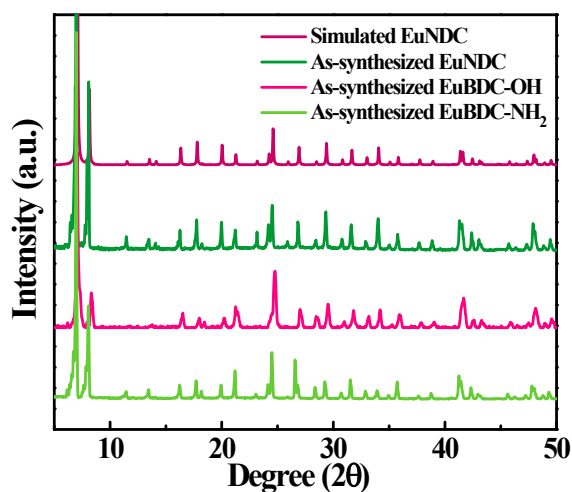

Fig. S5 PXRD patterns of simulated EuNDC and as-synthesized EuNDC, EuBDC-OH, and EuBDC-NH<sub>2</sub>.

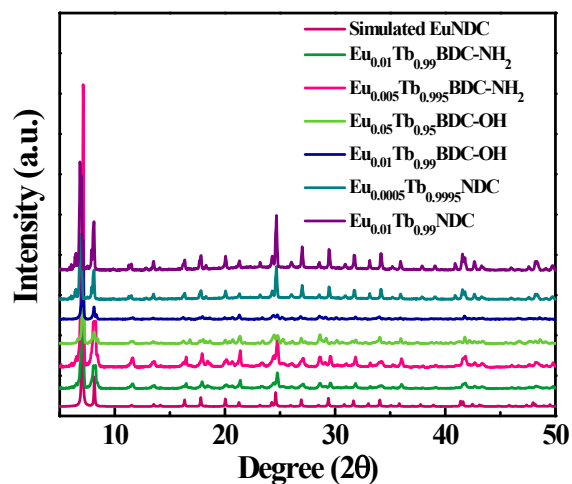

Fig. S6 PXRD patterns of as-synthesized  $\text{Eu}_{0.01}\text{Tb}_{0.99}\text{BDC-OH}$ ,  $\text{Eu}_{0.05}\text{Tb}_{0.95}\text{BDC-OH}$ ,  $\text{Eu}_{0.01}\text{Tb}_{0.99}\text{BDC-NH}_2$ ,  $\text{Eu}_{0.005}\text{Tb}_{0.995}\text{BDC-NH}_2$ ,  $\text{Eu}_{0.01}\text{Tb}_{0.99}\text{NDC}$ , and  $\text{Eu}_{0.0005}\text{Tb}_{0.9995}\text{NDC}$ .

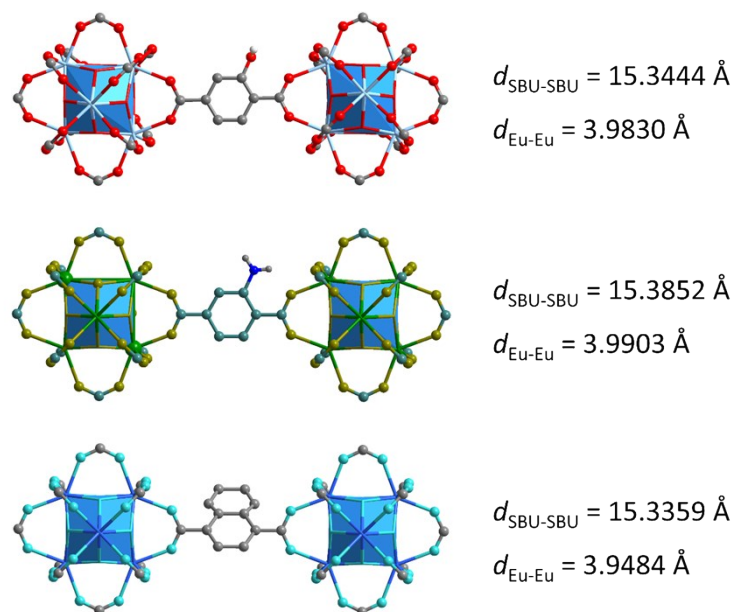

**Fig. S7** The shortest distances between SBUs and between Ln atoms in EuBDC-OH, EuBDC-NH<sub>2</sub> and EuNDC, respectively.

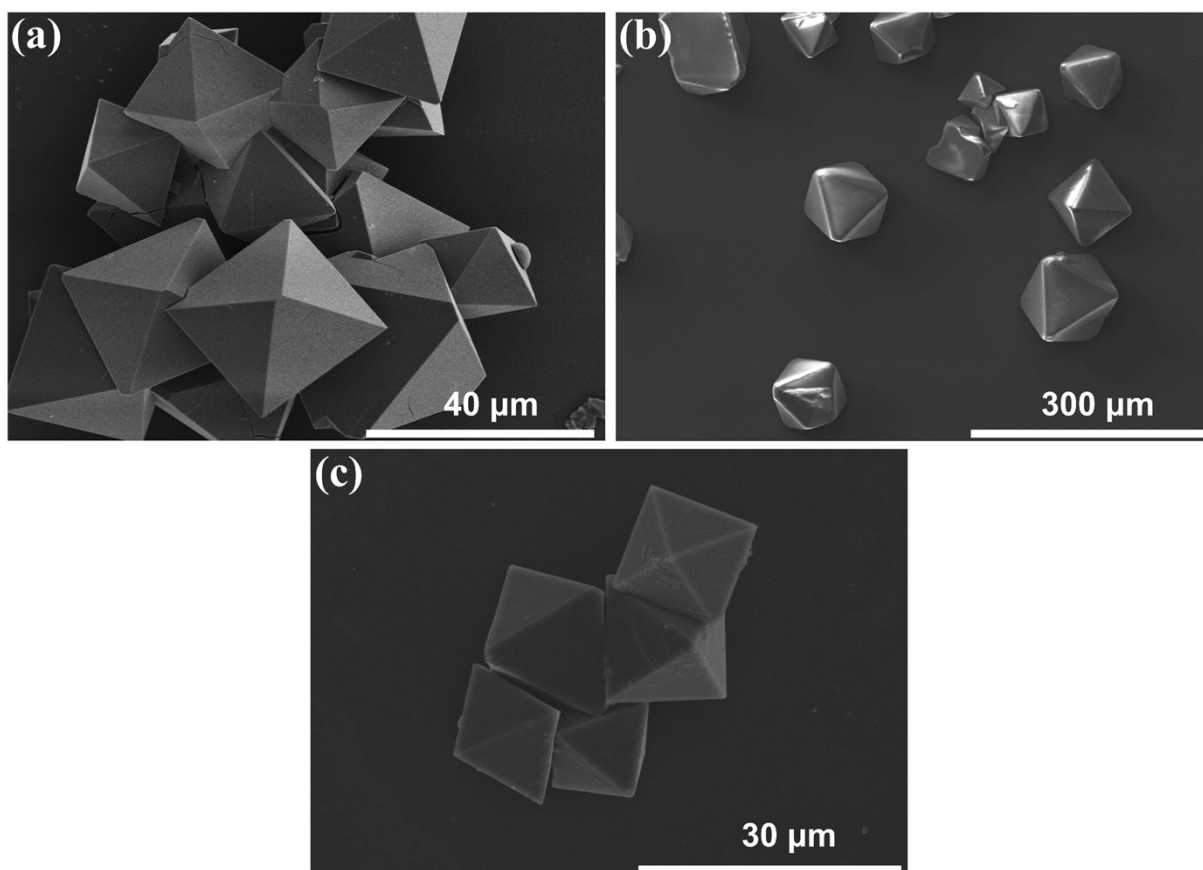

**Fig. S8** SEM images of (a) EuBDC-OH, (b) EuBDC-NH<sub>2</sub> and (c) EuNDC.



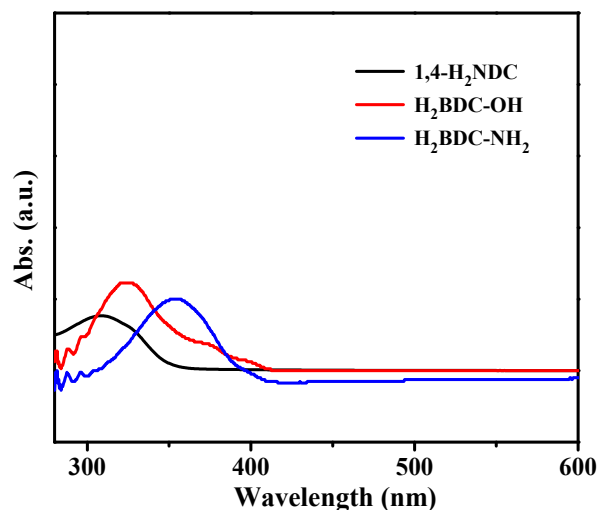

Fig. S9 UV-vis adsorption spectra of three organic ligands in DMF ( $1 \times 10^{-4}$  mol L $^{-1}$ ) at room temperature.

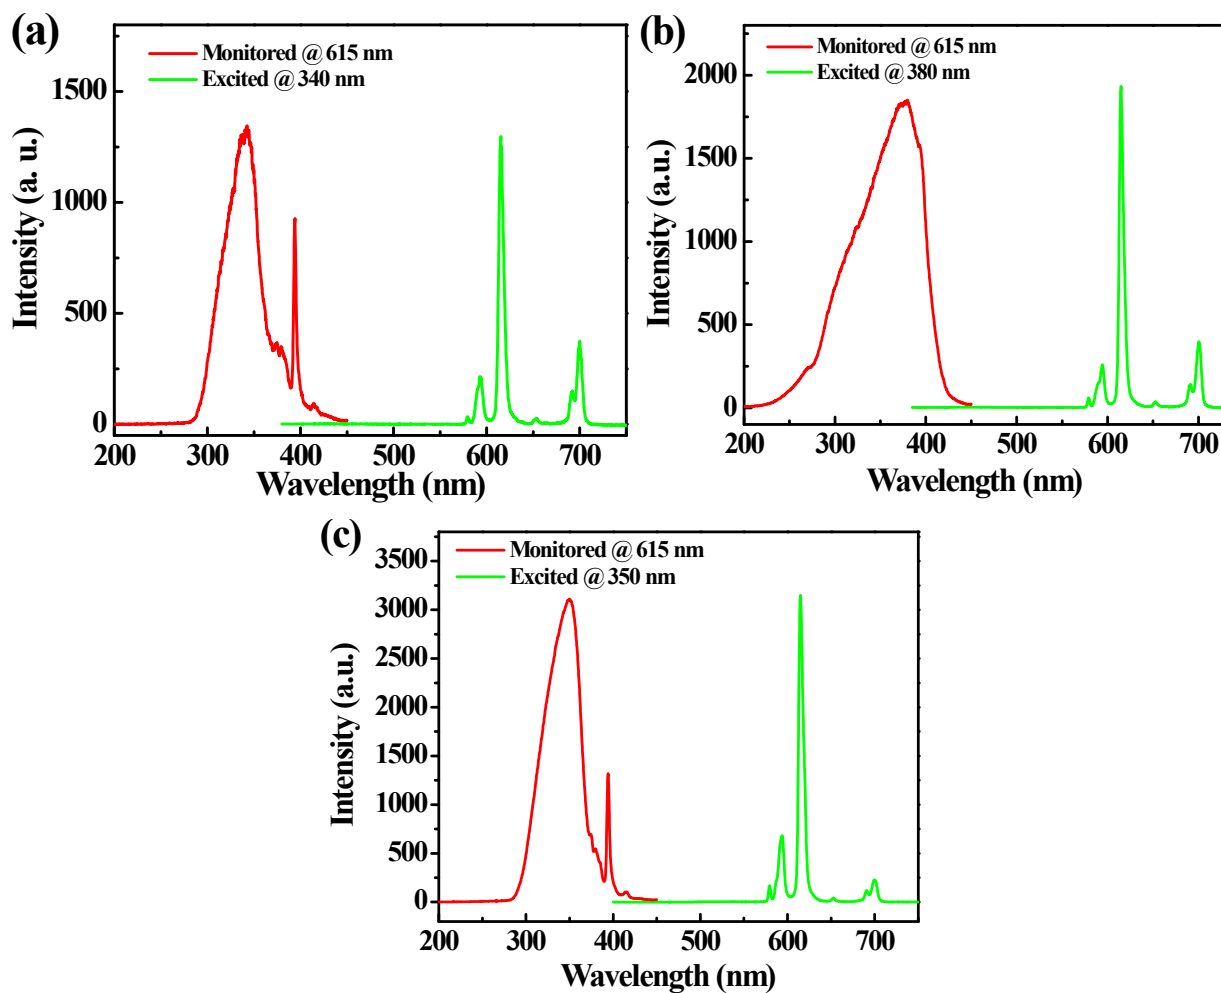

Fig. S10 The excitation and emission spectra of (a) EuBDC-OH, (b) EuBDC-NH $_2$  and (c) EuNDC in solid state.

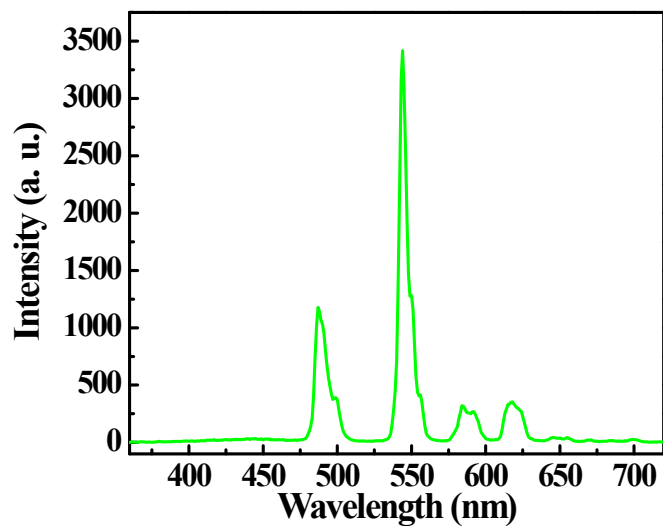

Fig. S11 The emission spectrum of Eu<sub>0.01</sub>Tb<sub>0.99</sub>BDC-OH upon excitation of 340 nm at room temperature.

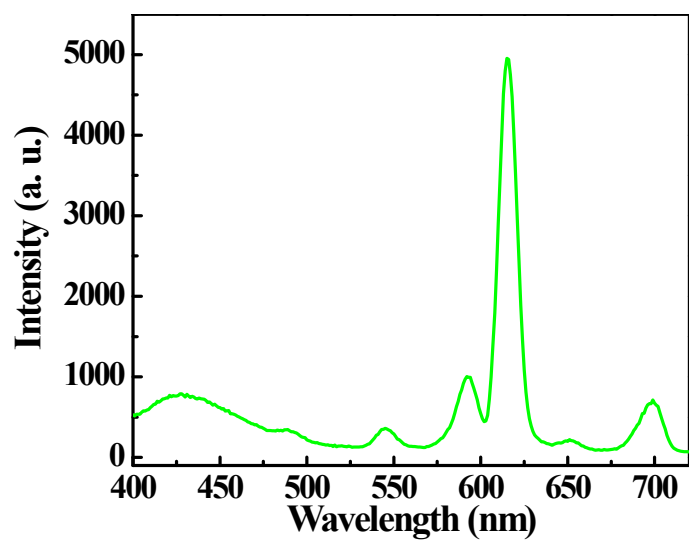

Fig. S12 The emission spectrum of Eu<sub>0.01</sub>Tb<sub>0.99</sub>BDC-NH<sub>2</sub> upon excitation of 375 nm at room temperature.

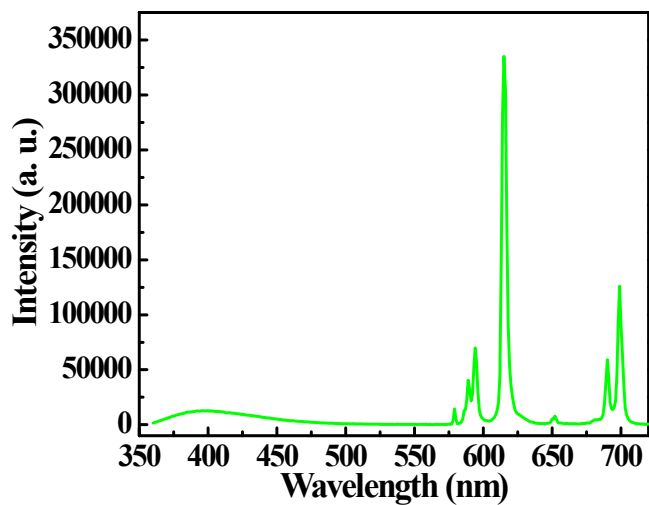

Fig. S13 The emission spectrum of Eu<sub>0.01</sub>Tb<sub>0.99</sub>NDC upon excitation of 350 nm at room temperature.

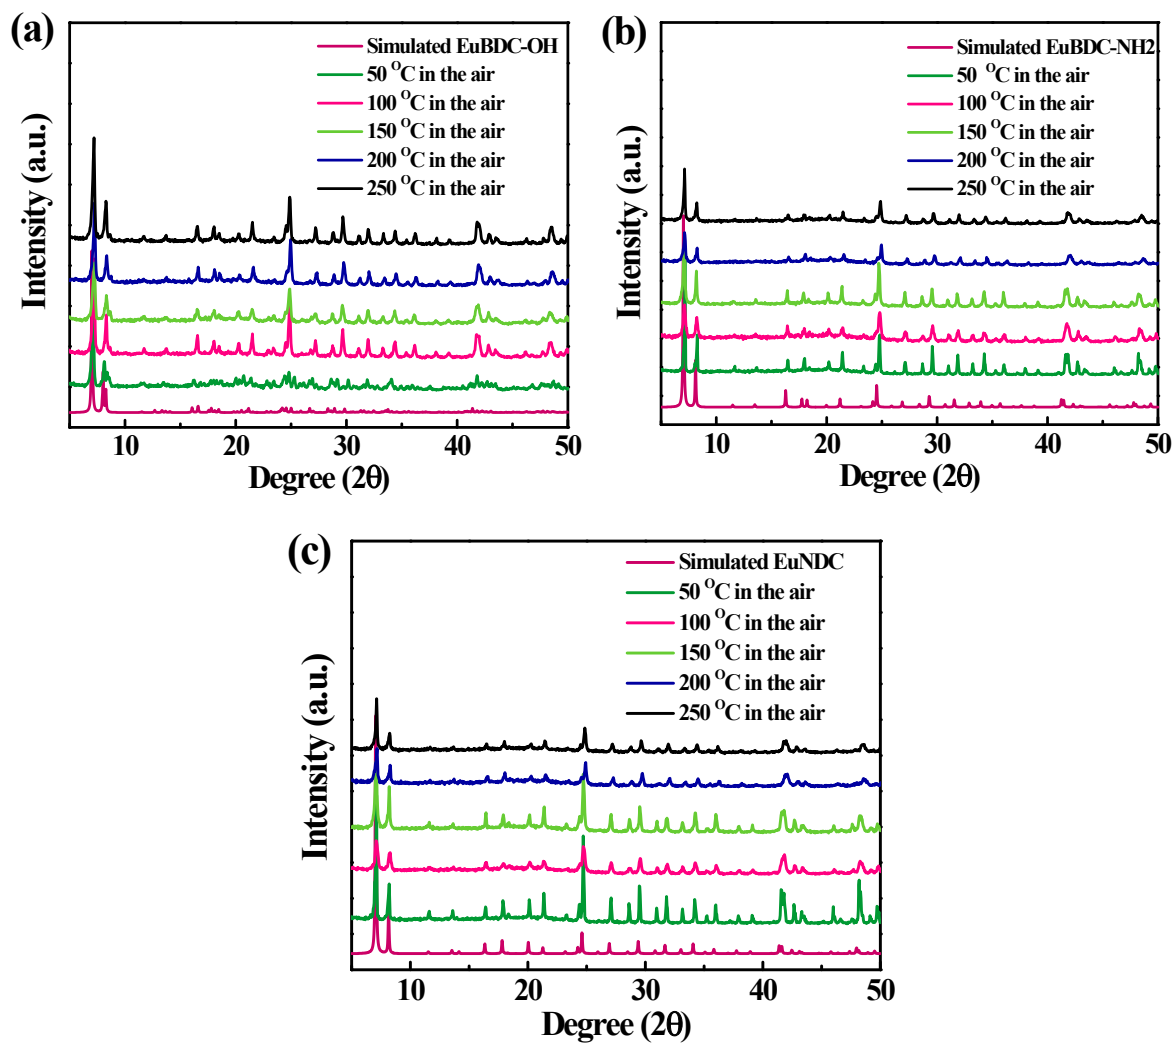

**Fig. S14** PXRD patterns of (a)  $\text{Eu}_{0.01}\text{Tb}_{0.99}\text{BDC-OH}$ , (b)  $\text{Eu}_{0.01}\text{Tb}_{0.99}\text{BDC-NH}_2$  and (c)  $\text{Eu}_{0.01}\text{Tb}_{0.99}\text{NDC}$  after different temperature treatment.

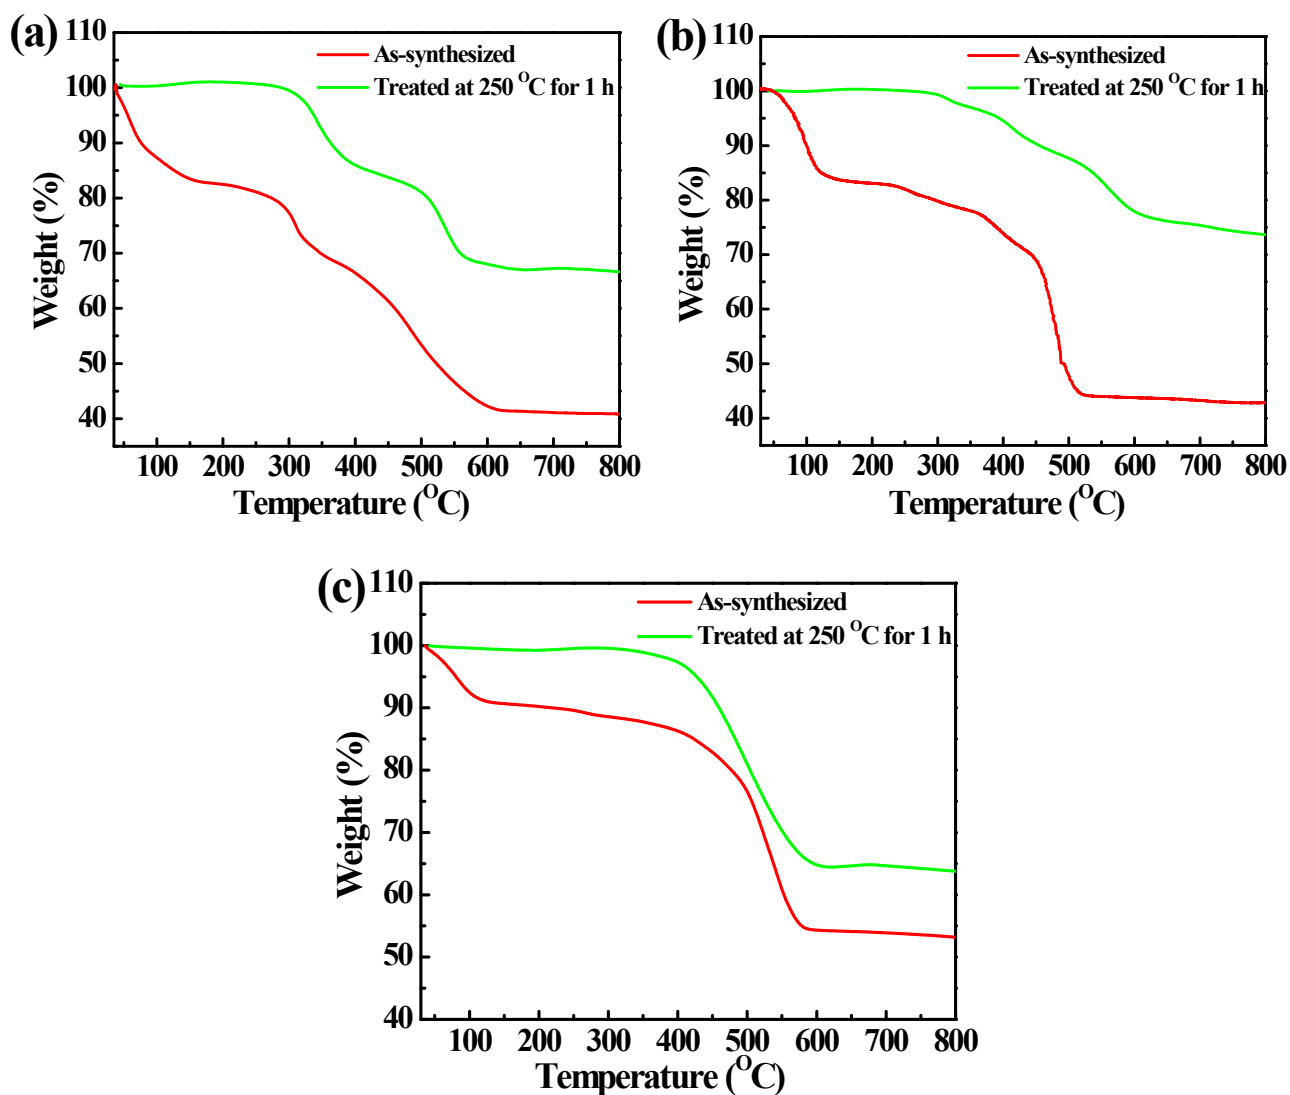

Fig. S15 TGA curves of (a)  $\text{Eu}_{0.01}\text{Tb}_{0.99}\text{BDC-OH}$ , (b)  $\text{Eu}_{0.01}\text{Tb}_{0.99}\text{BDC-NH}_2$  and (c)  $\text{Eu}_{0.01}\text{Tb}_{0.99}\text{NDC}$ .

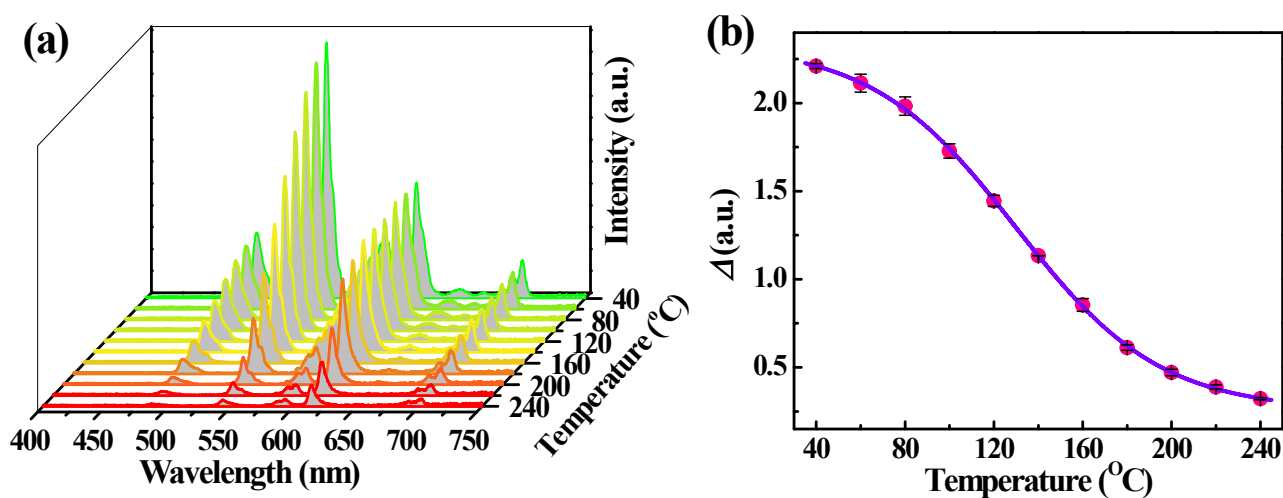

Fig. S16 Temperature-dependent emission spectra and thermometric parameter  $\Delta$  ( $\Delta = I_{\text{Tb}}/I_{\text{Eu}}$ ) of  $\text{Eu}_{0.05}\text{Tb}_{0.95}\text{BDC-OH}$ .

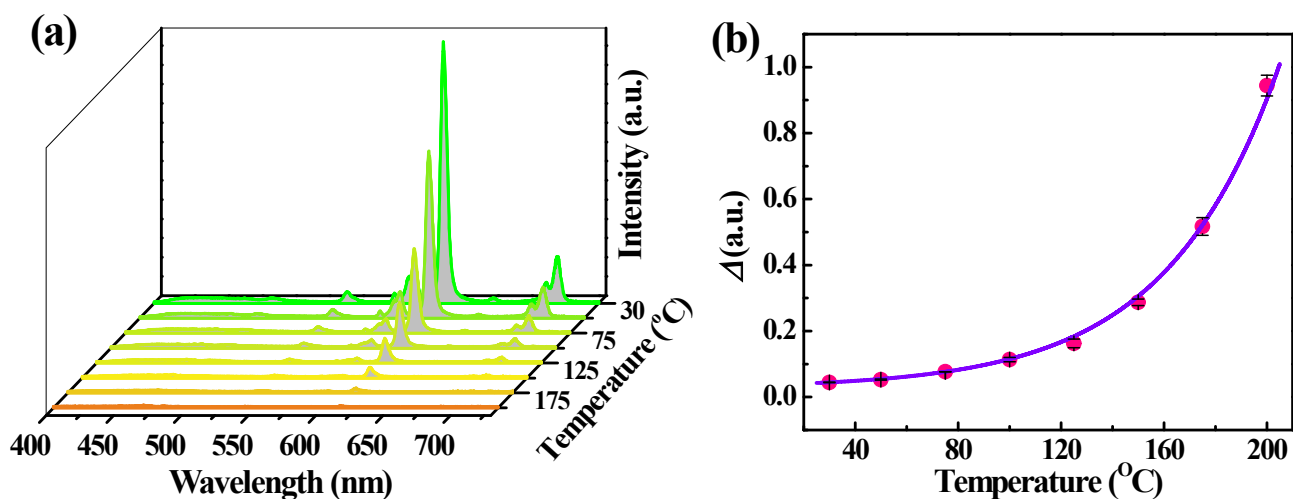

Fig. S17 Temperature-dependent emission spectra and thermometric parameter  $\Delta$  ( $\Delta = I_{Tb}/I_{Eu}$ ) of  $Eu_{0.005}Tb_{0.995}BDC-NH_2$ .

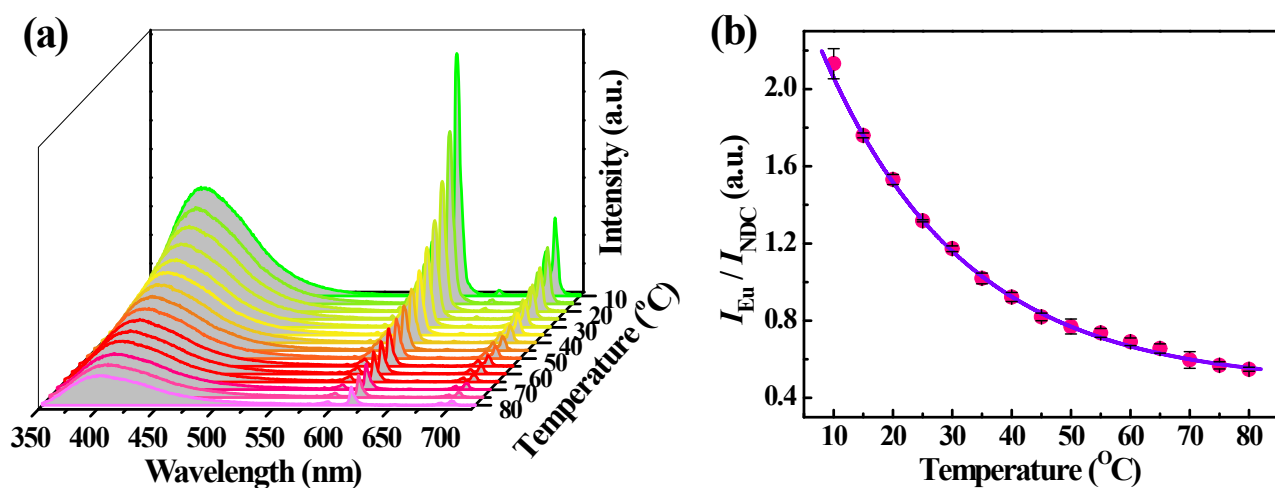

Fig. S18 Temperature-dependent emission spectra and thermometric parameter ( $I_{Eu}/I_{NDC}$ ) of  $Eu_{0.0005}Tb_{0.9995}NDC$ .

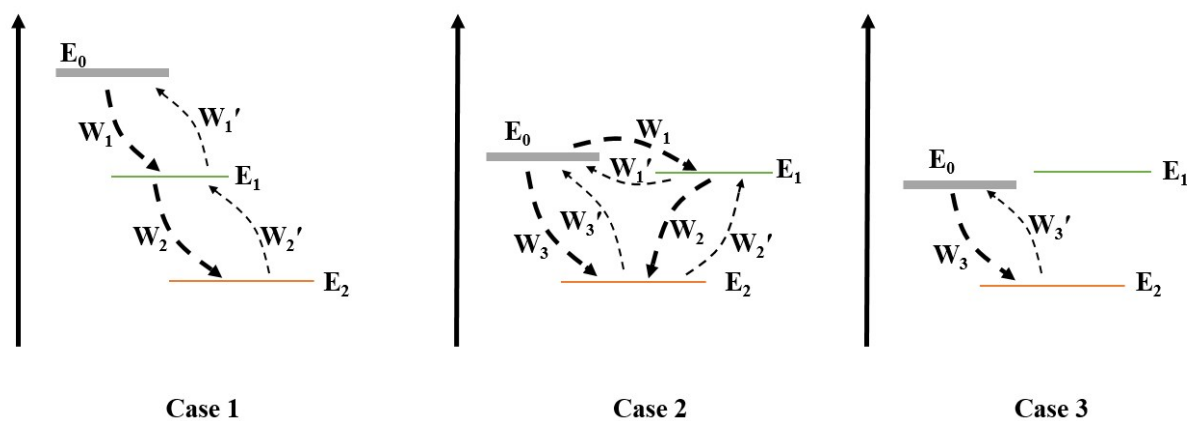

Fig. S19 The possible energy processes within  $Eu_{0.01}Tb_{0.99}BDC-OH$  (Case 1),  $Eu_{0.01}Tb_{0.99}BDC-NH_2$  (Case 2) and  $Eu_{0.01}Tb_{0.99}NDC$  (Case 3).

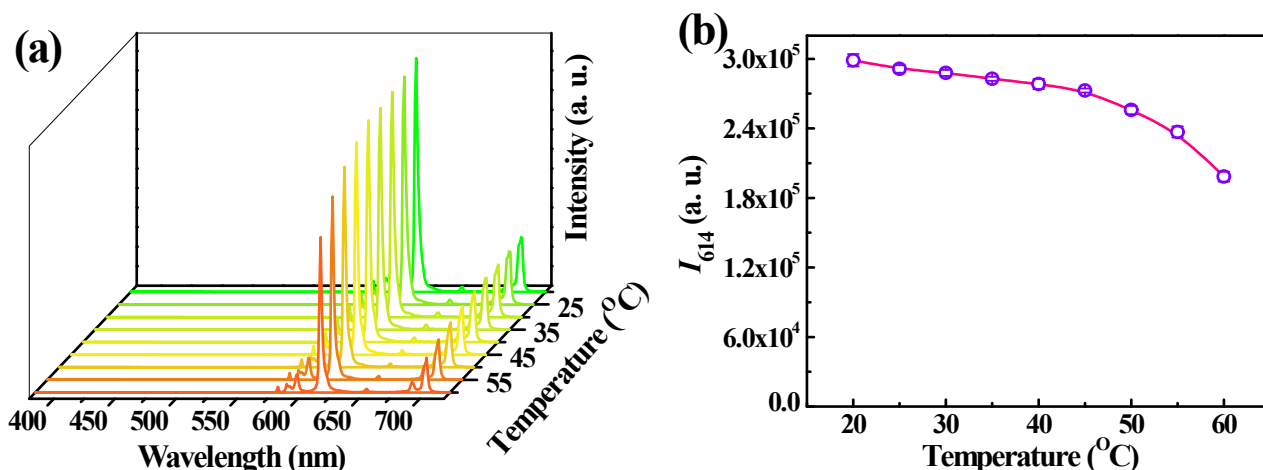

**Fig. S20** (a) Temperature-dependent emission spectra of EuNDC in the physiological temperature range from 20 to 60 °C. (b) Temperature-dependent integrated intensity of Eu<sup>3+</sup> emission at 614 nm.

The energy transfer rate from ligand to Tb is  $W_1$ , from Tb to Eu is  $W_2$  and from ligand to Eu is  $W_3$ , and their corresponding back energy transfer rates are  $W_1'$ ,  $W_2'$  and  $W_3'$ , and the energy distribution of ligands, Tb and Eu are  $E_0$ ,  $E_1$ , and  $E_2$ , respectively. According to Boltzmann law,  $W_i'$  can be defined as

$$W_i' = W_i e^{-\frac{\Delta E}{k_B T}} \quad \backslash * \text{MERGEFORMAT (1)}$$

where  $\Delta E$  is the energy gap between donor and acceptor,  $k_B$  is the Boltzmann constant. The energy distribution and transfer processes model in three cases can be analyzed as follows.

Case 1:

$$E_2 = E_1 (W_2 - W_2') \quad \backslash * \text{MERGEFORMAT (2)}$$

$$E_1 = E_0 (W_1 - W_1') - E_2 \quad \backslash * \text{MERGEFORMAT (3)}$$

Case 2:

$\Delta E[\text{T}_1(\text{H}_2\text{BDC-NH}_2)_5\text{D}_4(\text{Tb})]$  is calculated as  $847 \text{ cm}^{-1}$ ,  $W_1'$  almost equals to  $W_1$ .

$$E_2 = (E_0 - E_1)(W_3 - W_3') + E_1(W_2 - W_2') = (E_0 - E_1)(W_3 - W_3') + E_1(W_2 - W_2' + W_3' - W_3) \quad \backslash *$$

MERGEFORMAT (4)

Case 3:

$$E_2 = (W_3 - W_3')E_0 \quad \backslash * \text{MERGEFORMAT (5)}$$

### 3. References

1. A. Cadiou, C. D. S. Brites, P. M. F. J. Costa, R. A. S. Ferreira, J. Rocha and L. D. Carlos, *ACS Nano*, 2013, **7**, 7213–7218.
2. Y. Zhou, B. Yan and F. Lei, *Chemical Communications*, 2014, **50**, 15235–15238.
3. Y. Cui, R. Song, J. Yu, M. Liu, Z. Wang, C. Wu, Y. Yang, Z. Wang, B. Chen and G. Qian, *Advanced Materials*, 2015, **27**, 1420–1425.
4. Y. Zhou and B. Yan, *Journal of Materials Chemistry C*, 2015, **3**, 9353–9358.

5. D. Zhao, X. Rao, J. Yu, Y. Cui, Y. Yang and G. Qian, *Inorganic Chemistry*, 2015, **54**, 11193–11199.
6. X. Lian, D. Zhao, Y. Cui, Y. Yang and G. Qian, *Chemical Communications*, 2015, **51**, 17676–17679.
7. D. Zhao, J. Zhang, D. Yue, X. Lian, Y. Cui, Y. Yang and G. Qian, *Chemical Communications*, 2016, **52**, 8259–8262.
8. D. Zhao, X. Han, S. Wang, J. Liu, Y. Lu and C. Li, *Chemistry- A European Journal*, 2019, **26**, 3145–3151.
9. X. Rao, T. Song, J. Gao, Y. Cui, Y. Yang, C. Wu, B. Chen, G. Qian, *Journal of the American Chemical Society*, 2013, **135**, 15559–15564.
10. T. Xia, J. Wang, K. Jiang, Y. Cui, Y. Yang and G. Qian, *Chinese Chemical Letters*, 2018, **29**, 861–864.
